# Supplementary material
Source: PubMed Central journal article supplement (PMC8851532)
Supplement: sj-pdf-1-ebm-10.1177_15353702211053801.pdf [file sj-pdf-1-ebm-10.1177_15353702211053801.pdf]

---

## **Supplementary Materials**

Supplementary Figure S1. The relation between immune subtypes (IS1, IS2 and IS3) and clinical features including T stage (A), M stage (B), age (C) and gender (D) in TCGA dataset, and age (E), gender (F) in GSE22138 dataset.

Supplementary Table S1. Clinical data of TCGA-UVM dataset.

Supplementary Table S2. Clinical data of GSE22138 dataset.

Supplementary Table S3. Comparison of clinical information between TCGA-UVM and GSE22138 datasets.

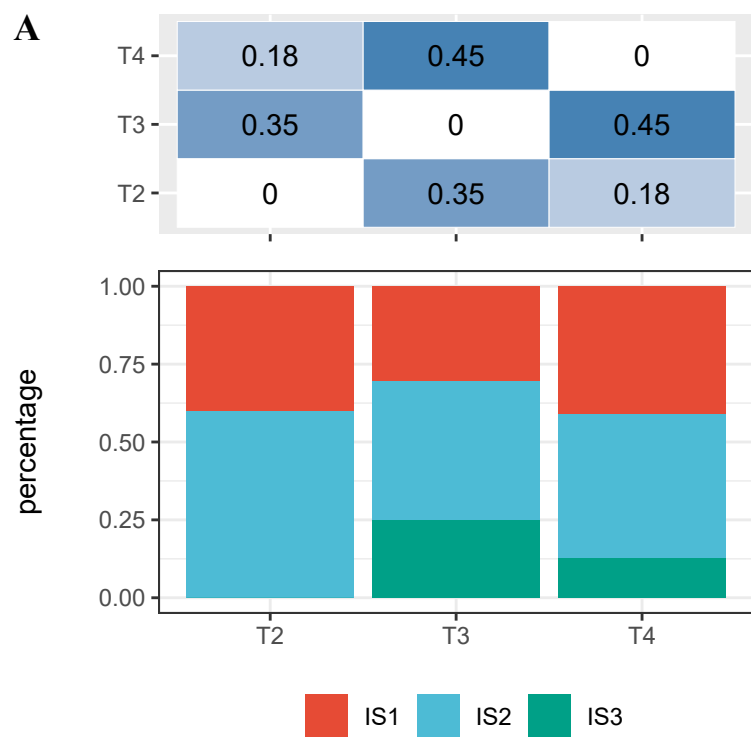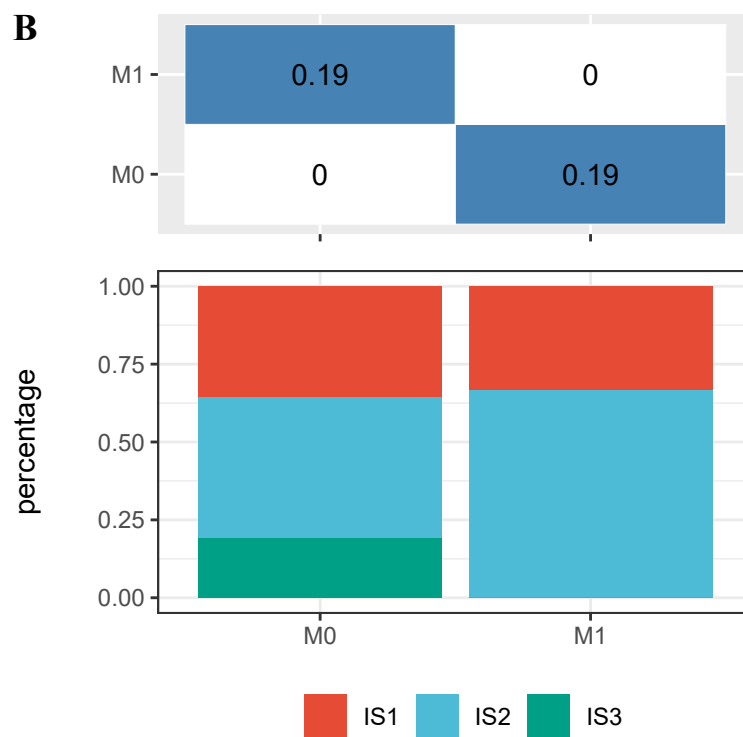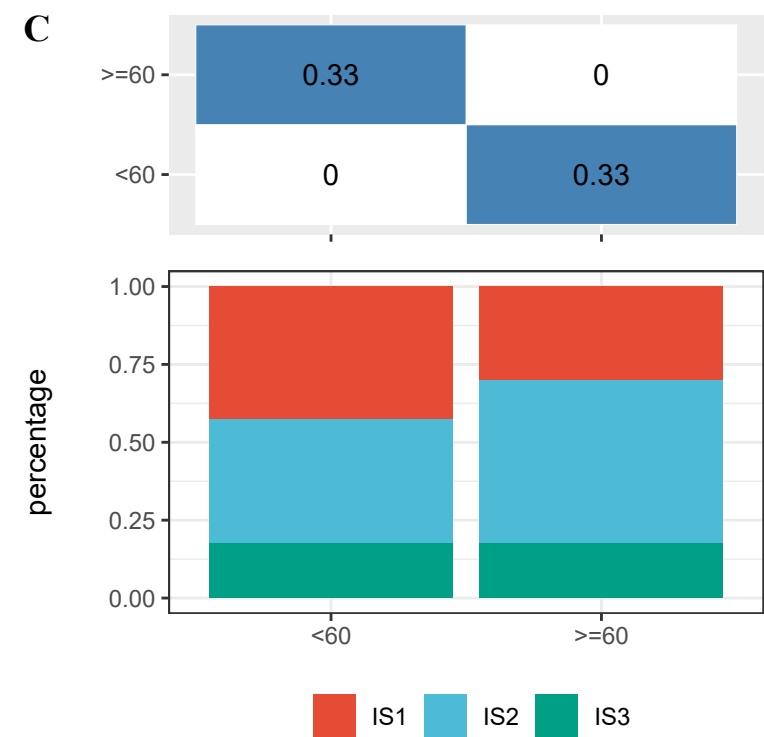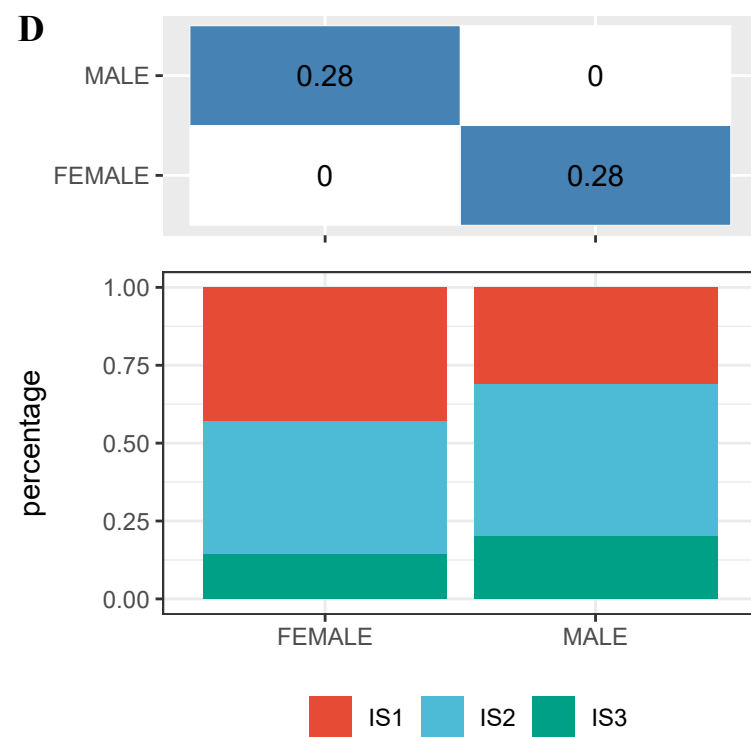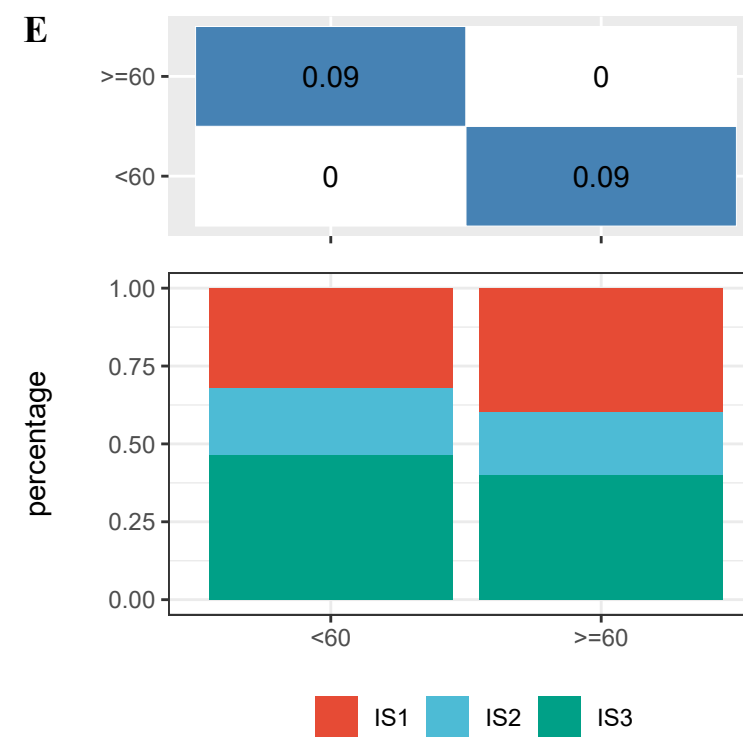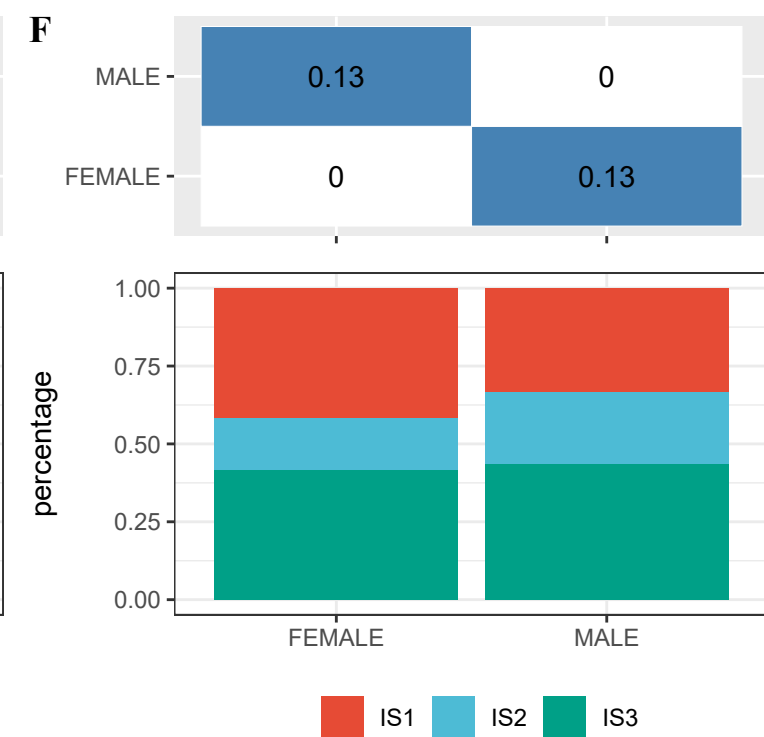

Supplementary Table S1. Clinical data of TCGA-UVM dataset.

| Samples      | OS.time | OS | DSS.time | DSS | DFI.time | DFI | PFI.time | PFI | Age | Gender | Stage     | T_Stage | N_Stage | M_Stage |
|--------------|---------|----|----------|-----|----------|-----|----------|-----|-----|--------|-----------|---------|---------|---------|
| TCGA-RZ-AB0B | 149     | 1  | 149      | 1   | NA       | NA  | 149      | 0   | 47  | FEMALE | Stage IV  | T4b     | NX      | MX      |
| TCGA-V3-A9ZX | 470     | 0  | 470      | 0   | NA       | NA  | 233      | 1   | 56  | MALE   | Stage II  | T2b     | NX      | MX      |
| TCGA-V3-A9ZY | 459     | 0  | 459      | 0   | NA       | NA  | 459      | 0   | 54  | MALE   | Stage II  | T3a     | NX      | MX      |
| TCGA-V4-A9E5 | 2499    | 0  | 2499     | 0   | NA       | NA  | 2499     | 0   | 51  | FEMALE | Stage III | T4b     | N0      | M0      |
| TCGA-V4-A9E7 | 415     | 1  | 415      | 1   | NA       | NA  | 35       | 1   | 76  | MALE   | Stage III | T4a     | N0      | M0      |
| TCGA-V4-A9E8 | 808     | 1  | 808      | 1   | NA       | NA  | 557      | 1   | 49  | MALE   | Stage III | T4a     | N0      | M0      |
| TCGA-V4-A9E9 | 1246    | 0  | 1246     | 0   | NA       | NA  | 1246     | 0   | 50  | MALE   | Stage III | T4a     | N0      | M0      |
| TCGA-V4-A9EA | 1348    | 0  | 1348     | 0   | NA       | NA  | 1348     | 0   | 66  | MALE   | Stage III | T4a     | N0      | M0      |
| TCGA-V4-A9EC | 743     | 0  | 743      | 0   | NA       | NA  | 743      | 0   | 75  | FEMALE | Stage II  | T3a     | N0      | M0      |
| TCGA-V4-A9ED | 1078    | 0  | 1078     | 0   | NA       | NA  | 1078     | 0   | 45  | MALE   | Stage III | T3b     | N0      | M0      |
| TCGA-V4-A9EE | 398     | 1  | 398      | 1   | NA       | NA  | 211      | 1   | 86  | MALE   | Stage II  | T3a     | N0      | M0      |
| TCGA-V4-A9EF | 1165    | 0  | 1165     | 0   | NA       | NA  | 1165     | 0   | 56  | MALE   | Stage III | T4b     | N0      | M0      |
| TCGA-V4-A9EH | 670     | 0  | 670      | 0   | NA       | NA  | 670      | 0   | 53  | MALE   | Stage III | T4c     | N0      | M0      |
| TCGA-V4-A9EI | 389     | 1  | 389      | 1   | NA       | NA  | 203      | 1   | 78  | MALE   | Stage III | T4c     | N0      | M0      |
| TCGA-V4-A9EJ | 746     | 0  | 746      | 0   | NA       | NA  | 746      | 0   | 38  | MALE   | Stage II  | T3a     | N0      | M0      |
| TCGA-V4-A9EK | 1028    | 0  | 1028     | 0   | NA       | NA  | 1028     | 0   | 37  | FEMALE | Stage II  | T3a     | N0      | M0      |
| TCGA-V4-A9EL | 982     | 0  | 982      | 0   | NA       | NA  | 413      | 1   | 60  | MALE   | Stage III | T4a     | N0      | M0      |
| TCGA-V4-A9EM | 966     | 0  | 966      | 0   | NA       | NA  | 966      | 0   | 53  | MALE   | Stage III | T4a     | N0      | M0      |
| TCGA-V4-A9EO | 773     | 0  | 773      | 0   | NA       | NA  | 773      | 0   | 74  | MALE   | Stage III | T4a     | N0      | M0      |
| TCGA-V4-A9EQ | 455     | 1  | 455      | 1   | NA       | NA  | 252      | 1   | 64  | MALE   | Stage III | T4a     | N0      | M0      |
| TCGA-V4-A9ES | 1511    | 0  | 1511     | 0   | NA       | NA  | 1299     | 1   | 54  | FEMALE | Stage III | T3b     | N0      | M0      |
| TCGA-V4-A9ET | 1362    | 0  | 1362     | 0   | NA       | NA  | 1362     | 0   | 57  | MALE   | Stage III | T4b     | N0      | M0      |

---

|              |      |   |      |   |    |    |      |   |    |        |           |     |    |     |
|--------------|------|---|------|---|----|----|------|---|----|--------|-----------|-----|----|-----|
| TCGA-V4-A9EU | 709  | 0 | 709  | 0 | NA | NA | 86   | 1 | 83 | FEMALE | Stage III | T4d | N0 | M0  |
| TCGA-V4-A9EV | 1269 | 1 | 1269 | 1 | NA | NA | 1269 | 1 | 59 | FEMALE | Stage III | T4a | N0 | M0  |
| TCGA-V4-A9EW | 1211 | 0 | 1211 | 0 | NA | NA | 197  | 1 | 44 | FEMALE | Stage III | T4a | N0 | M0  |
| TCGA-V4-A9EX | 730  | 1 | 730  | 1 | NA | NA | 381  | 1 | 55 | FEMALE | Stage III | T4a | N0 | M0  |
| TCGA-V4-A9EY | 837  | 0 | 837  | 0 | NA | NA | 837  | 0 | 66 | FEMALE | Stage III | T4a | N0 | M0  |
| TCGA-V4-A9EZ | 599  | 0 | 599  | 0 | NA | NA | 599  | 0 | 78 | FEMALE | Stage II  | T3a | N0 | M0  |
| TCGA-V4-A9F0 | 945  | 1 | 945  | 1 | NA | NA | 489  | 1 | 59 | MALE   | Stage III | T4b | N0 | M0  |
| TCGA-V4-A9F1 | 938  | 0 | 938  | 0 | NA | NA | 938  | 0 | 46 | FEMALE | Stage II  | T3a | N0 | M0  |
| TCGA-V4-A9F2 | 734  | 0 | 734  | 0 | NA | NA | 734  | 0 | 78 | FEMALE | Stage III | T3b | N0 | M0  |
| TCGA-V4-A9F3 | 873  | 1 | 873  | 1 | NA | NA | 329  | 1 | 49 | FEMALE | Stage III | T4a | N0 | M0  |
| TCGA-V4-A9F4 | 634  | 0 | 634  | 0 | NA | NA | 634  | 0 | 41 | MALE   | Stage III | T4a | N0 | M0  |
| TCGA-V4-A9F5 | 203  | 0 | 203  | 0 | NA | NA | 78   | 1 | 85 | FEMALE | Stage IV  | T4e | N0 | M1b |
| TCGA-V4-A9F7 | 1256 | 0 | 1256 | 0 | NA | NA | 1256 | 0 | 78 | FEMALE | Stage II  | T3a | N0 | M0  |
| TCGA-V4-A9F8 | 597  | 0 | 597  | 0 | NA | NA | 597  | 0 | 68 | MALE   | Stage III | T4a | N0 | M0  |
| TCGA-VD-A8K7 | 1459 | 0 | 1459 | 0 | NA | NA | 1459 | 0 | 39 | MALE   | Stage III | T4a | N0 | M0  |
| TCGA-VD-A8K8 | 1377 | 1 | 1377 | 1 | NA | NA | 1377 | 1 | 56 | FEMALE | Stage II  | T4a | N0 | M0  |
| TCGA-VD-A8K9 | 1424 | 0 | 1424 | 0 | NA | NA | 1424 | 0 | 71 | FEMALE | Stage II  | T3a | N0 | M0  |
| TCGA-VD-A8KA | 1178 | 0 | 1178 | 0 | NA | NA | 1008 | 1 | 22 | MALE   | Stage II  | T3a | N0 | M0  |
| TCGA-VD-A8KB | 1354 | 0 | 1354 | 0 | NA | NA | 1032 | 1 | 66 | FEMALE | Stage II  | T3a | N0 | M0  |
| TCGA-VD-A8KD | 114  | 1 | 114  | 1 | NA | NA | NA   | 1 | 72 | MALE   | Stage IV  | T4a | N0 | M1  |
| TCGA-VD-A8KE | 821  | 0 | 821  | 0 | NA | NA | 821  | 0 | 74 | FEMALE | Stage II  | T2a | N0 | M0  |
| TCGA-VD-A8KF | 40   | 1 | 40   | 1 | NA | NA | 40   | 1 | 68 | MALE   | Stage III | T4b | N0 | M0  |
| TCGA-VD-A8KG | 19   | 0 | 19   | 0 | NA | NA | 19   | 0 | 47 | FEMALE | Stage II  | T2a | N0 | M0  |
| TCGA-VD-A8KH | 1158 | 0 | 1158 | 0 | NA | NA | 1158 | 0 | 69 | MALE   | Stage III | T4b | N0 | M0  |
| TCGA-VD-A8KI | 1113 | 1 | 1113 | 1 | NA | NA | 1113 | 1 | 68 | MALE   | Stage II  | T3a | N0 | M0  |

---

|              |      |   |      |   |    |    |      |   |    |        |           |     |    |    |
|--------------|------|---|------|---|----|----|------|---|----|--------|-----------|-----|----|----|
| TCGA-VD-A8KJ | 1150 | 0 | 1150 | 0 | NA | NA | 1150 | 0 | 53 | MALE   | Stage II  | T3a | NO | M0 |
| TCGA-VD-A8KK | 64   | 0 | 64   | 0 | NA | NA | 64   | 0 | 54 | MALE   | Stage III | T4a | NO | M0 |
| TCGA-VD-A8KL | 638  | 0 | 638  | 0 | NA | NA | 638  | 0 | 77 | FEMALE | Stage II  | T3a | NO | M0 |
| TCGA-VD-A8KM | 4    | 0 | 4    | 0 | NA | NA | 4    | 0 | 65 | MALE   | Stage II  | T3a | NO | M0 |
| TCGA-VD-A8KN | 68   | 0 | 68   | 0 | NA | NA | 68   | 0 | 60 | FEMALE | Stage II  | T3a | NO | M0 |
| TCGA-VD-A8KO | 795  | 0 | 795  | 0 | NA | NA | 795  | 0 | 51 | MALE   | Stage II  | T4a | NO | M0 |
| TCGA-VD-AA8M | 6    | 0 | 6    | 0 | NA | NA | 6    | 0 | 64 | MALE   | Stage II  | T3a | NO | M0 |
| TCGA-VD-AA8N | 44   | 0 | 44   | 0 | NA | NA | 44   | 0 | 86 | MALE   | Stage II  | T4a | NO | M0 |
| TCGA-VD-AA8O | 606  | 1 | 606  | 1 | NA | NA | 606  | 1 | 77 | MALE   | Stage II  | T3a | NO | M0 |
| TCGA-VD-AA8P | 86   | 0 | 86   | 0 | NA | NA | 86   | 0 | 64 | FEMALE | Stage II  | T3a | NO | M0 |
| TCGA-VD-AA8Q | 636  | 1 | 636  | 1 | NA | NA | 636  | 0 | 71 | MALE   | Stage II  | T3a | NO | M0 |
| TCGA-VD-AA8R | 6    | 0 | 6    | 0 | NA | NA | 6    | 0 | 78 | FEMALE | Stage II  | T3a | NO | M0 |
| TCGA-VD-AA8S | 427  | 0 | 427  | 0 | NA | NA | 427  | 0 | 40 | MALE   | Stage II  | T3a | NO | M0 |
| TCGA-VD-AA8T | 49   | 0 | 49   | 0 | NA | NA | 49   | 0 | 83 | FEMALE | Stage II  | T3a | NO | M0 |
| TCGA-WC-A87T | 2600 | 0 | 2600 | 0 | NA | NA | 2020 | 1 | 64 | MALE   | Stage II  | T3  | NO | M0 |
| TCGA-WC-A87U | 1581 | 1 | 1581 | 0 | NA | NA | 1581 | 1 | 73 | MALE   | Stage III | T3  | NO | M0 |
| TCGA-WC-A87W | 1703 | 0 | 1703 | 0 | NA | NA | 606  | 1 | 57 | FEMALE | Stage II  | T2  | NO | M0 |
| TCGA-WC-A87Y | 1314 | 1 | 1314 | 1 | NA | NA | 1314 | 0 | 59 | MALE   | Stage III | T3  | NO | M0 |
| TCGA-WC-A880 | 1258 | 0 | 1258 | 0 | NA | NA | 1258 | 0 | 63 | MALE   | Stage III | T3  | NO | M0 |
| TCGA-WC-A881 | 1065 | 0 | 1065 | 0 | NA | NA | 1065 | 0 | 75 | MALE   | Stage II  | T4  | NO | M0 |
| TCGA-WC-A882 | 1112 | 0 | 1112 | 0 | NA | NA | 1112 | 0 | 50 | FEMALE | Stage II  | T3  | NO | M0 |
| TCGA-WC-A883 | 241  | 1 | 241  | 1 | NA | NA | 241  | 1 | 76 | FEMALE | Stage III | T4  | NO | M0 |
| TCGA-WC-A884 | 12   | 0 | 12   | 0 | NA | NA | 12   | 0 | 35 | FEMALE | Stage III | T4b | NO | M0 |
| TCGA-WC-A885 | 686  | 0 | 686  | 0 | NA | NA | 686  | 0 | 60 | MALE   | Stage II  | T3  | NO | M0 |
| TCGA-WC-A888 | 575  | 1 | 575  | 0 | NA | NA | 575  | 0 | 76 | MALE   | Stage II  | T3  | NO | M0 |

---

|              |      |   |      |   |    |    |      |   |    |        |           |     |    |     |
|--------------|------|---|------|---|----|----|------|---|----|--------|-----------|-----|----|-----|
| TCGA-WC-A88A | 82   | 1 | 82   | 1 | NA | NA | 82   | 1 | 75 | MALE   | Stage IV  | T4d | NX | M1b |
| TCGA-WC-AA9A | 453  | 1 | 453  | 1 | NA | NA | 371  | 1 | 70 | FEMALE | Stage II  | T2a | N0 | M0  |
| TCGA-WC-AA9E | 838  | 0 | 838  | 0 | NA | NA | 838  | 0 | 60 | MALE   | Stage II  | T3  | N0 | M0  |
| TCGA-YZ-A980 | 1862 | 0 | 1862 | 0 | NA | NA | 1556 | 1 | 75 | MALE   | Stage III | T3b | N0 | M0  |
| TCGA-YZ-A982 | 495  | 0 | 495  | 0 | NA | NA | 495  | 0 | 79 | FEMALE | Stage III | T4b | N0 | M0  |
| TCGA-YZ-A983 | 798  | 0 | 798  | 0 | NA | NA | 798  | 0 | 51 | FEMALE | Stage II  | T3a | N0 | M0  |
| TCGA-YZ-A984 | 1396 | 1 | 1396 | 1 | NA | NA | 154  | 1 | 50 | FEMALE | Stage II  | T4a | N0 | MX  |
| TCGA-YZ-A985 | 1184 | 0 | 1184 | 0 | NA | NA | 1184 | 0 | 41 | FEMALE | Stage III | T4a | N0 | M0  |

---

---

---

Supplementary Table S2. Clinical data of GSE22138 dataset.

| Samples   | OS.time | OS | Age   | Gender |
|-----------|---------|----|-------|--------|
| GSM550623 | 2190    | 0  | 76.54 | female |
| GSM550624 | 963.9   | 1  | 67.57 | male   |
| GSM550625 | 11.7    | 1  | 61.82 | male   |
| GSM550626 | 1920    | 1  | 46.4  | male   |
| GSM550627 | 2034.3  | 0  | 84.99 | male   |
| GSM550628 | 2582.4  | 0  | 50.64 | female |
| GSM550629 | 2552.7  | 0  | 38.67 | male   |
| GSM550630 | 184.2   | 1  | 59.1  | male   |
| GSM550631 | 1673.7  | 0  | 52.33 | male   |
| GSM550632 | 1656.9  | 0  | 32.94 | male   |
| GSM550633 | 237.6   | 1  | 70.09 | male   |
| GSM550634 | 502.8   | 1  | 60.8  | male   |
| GSM550635 | 27.6    | 1  | 54.81 | female |
| GSM550636 | 196.2   | 1  | 75.66 | male   |
| GSM550637 | 2694.6  | 0  | 45.97 | male   |
| GSM550638 | 653.4   | 1  | 51.61 | female |
| GSM550639 | 3619.2  | 0  | 66.2  | female |
| GSM550640 | 2864.1  | 0  | 51.95 | female |
| GSM550641 | 753.9   | 0  | 59.41 | male   |
| GSM550642 | 1801.8  | 0  | 68.51 | male   |
| GSM550643 | 424.8   | 0  | 65.62 | male   |
| GSM550644 | 2039.4  | 0  | 47.62 | female |
| GSM550645 | 211.8   | 1  | 69.09 | male   |
| GSM550646 | 260.1   | 1  | 75.75 | female |
| GSM550647 | 1470.6  | 1  | 67.46 | female |
| GSM550648 | 866.4   | 1  | 40.41 | female |
| GSM550649 | 629.7   | 1  | 72.29 | male   |
| GSM550650 | 3012    | 0  | 62.62 | male   |
| GSM550651 | 2574.6  | 0  | 51.91 | female |
| GSM550652 | 736.2   | 1  | 63.03 | male   |
| GSM550653 | 1073.4  | 1  | 65.2  | male   |
| GSM550654 | 1672.5  | 0  | 40.31 | male   |
| GSM550655 | 2700.6  | 0  | 28.56 | female |
| GSM550656 | 2811.9  | 0  | 57.69 | male   |
| GSM550657 | 819     | 1  | 55.68 | female |
| GSM550658 | 2104.2  | 0  | 72.82 | male   |
| GSM550659 | 1577.1  | 1  | 47.43 | female |
| GSM550660 | 1190.7  | 0  | 78.98 | male   |
| GSM550661 | 568.8   | 1  | 77.95 | female |



---

|           |        |   |       |        |
|-----------|--------|---|-------|--------|
| GSM550662 | 386.4  | 1 | 62.88 | male   |
| GSM550663 | 3.9    | 1 | 54.41 | female |
| GSM550664 | 733.2  | 1 | 77.68 | female |
| GSM550665 | 1880.7 | 0 | 56.17 | female |
| GSM550666 | 2032.5 | 0 | 72.79 | male   |
| GSM550667 | 2051.1 | 1 | 53.07 | female |
| GSM550668 | 448.5  | 1 | 48.46 | male   |
| GSM550669 | 1762.2 | 1 | 68.83 | female |
| GSM550670 | 566.7  | 1 | 62.12 | male   |
| GSM550671 | 219.9  | 1 | 56.33 | male   |
| GSM550672 | 1066.5 | 1 | 68.36 | male   |
| GSM550673 | 250.2  | 1 | 69.05 | male   |
| GSM550674 | 935.4  | 0 | 50.17 | male   |
| GSM550675 | 2021.4 | 0 | 56.25 | female |
| GSM550676 | 946.2  | 0 | 82.79 | female |
| GSM550677 | 185.4  | 1 | 70.26 | male   |
| GSM550678 | 279    | 0 | 80.66 | male   |
| GSM550679 | 528.3  | 1 | 50.17 | male   |
| GSM550680 | 952.2  | 0 | 66.26 | male   |
| GSM550681 | 1513.8 | 0 | 56.1  | female |
| GSM550682 | 445.5  | 1 | 64.55 | male   |
| GSM550683 | 1107   | 1 | 60.35 | male   |
| GSM550684 | 1331.7 | 1 | 65.72 | female |
| GSM550685 | 227.7  | 1 | 73.13 | male   |

---

Supplementary Table S3. Comparison of clinical information between TCGA-UVM and GSE22138 datasets.

| <b>Clinical information</b> | <b>TCGA-UVM<br/>(training dataset)</b> | <b>GSE22138<br/>(validation dataset)</b> |
|-----------------------------|----------------------------------------|------------------------------------------|
| <b>Age (years)</b>          |                                        |                                          |
| ≥ 60                        | 44                                     | 35                                       |
| < 60                        | 36                                     | 28                                       |
| <b>Gender</b>               |                                        |                                          |
| Male                        | 45                                     | 39                                       |
| Female                      | 35                                     | 24                                       |
| <b>T Stage</b>              |                                        |                                          |
| T2                          | 5                                      | /                                        |
| T3                          | 36                                     | /                                        |
| T4                          | 39                                     | /                                        |
| <b>N Stage</b>              |                                        |                                          |
| N0                          | 76                                     | /                                        |
| NX                          | 4                                      | /                                        |
| <b>M Stage</b>              |                                        |                                          |
| M0                          | 73                                     | /                                        |
| M1                          | 3                                      | /                                        |
| MX                          | 4                                      | /                                        |
| <b>Stage</b>                |                                        |                                          |
| Stage II                    | 39                                     | /                                        |
| Stage III                   | 37                                     | /                                        |
| Stage IV                    | 4                                      | /                                        |
